# Supplementary material
Source: PubMed Central journal article supplement (PMC3343308)
Supplement: cr2010169x1.pdf [file cr2010169x1.pdf]

## Supplementary information

**Manuscript title:** “Aquaporin3 is a sperm water channel essential for post-copulatory sperm osmo-adaptation and migration”

**Author list:** Qi Chen, Hongying Peng, Li Lei, Ying Zhang, Haibin Kuang, Yujing Cao, Qi-xian Shi, Tonghui Ma, Enkui Duan

### Supplementary Figure S1

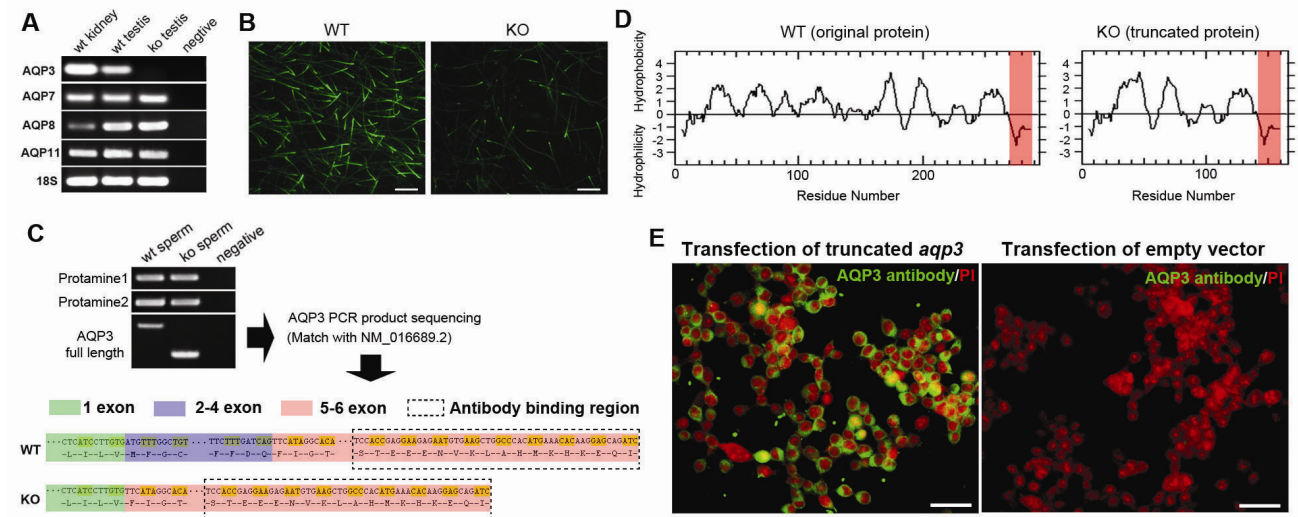

**Supplementary Figures S1** AQP3 expression in testis and sperm. **A.** Semiquantitative RT-PCR detection of AQP3, 7, 8, 11 in testis. AQP3 primers designed within exon 3. **B.** Immunofluorescence detection of AQP3 in sperm. Scale bars represent 20  $\mu$ m. It should be noted that sperm from *Aqp3*<sup>-/-</sup> mice also showed positive staining, although the intensity is lower. This is because the *Aqp3*<sup>-/-</sup> sperm could express a truncated *aqp3* transcript as shown in panel (C,D,E). **C.** Full-length *aqp3* PCR detection showed that sperms from both wild-type and *Aqp3*<sup>-/-</sup> mice express *aqp3* mRNA, the *Aqp3*<sup>-/-</sup> sperm express a truncated *aqp3* transcript lacking exons 2-4, retaining a full sequence of exon1 linking with exons 5-6, which could be translated into a nonfunctional peptide containing the antibody detection region (C-terminal). Protamine1 and 2 were used as an internal control for sperm mRNA. **D.** Kyte-Doolittle analyses showed hydrophobic scores of original and truncated AQP3 protein, suggesting that the truncated AQP3 protein is highly hydrophobic with three predicted transmembrane domain, leaving the hydrophilic C-terminal detectable by the antibody. The red shaded region demonstrate antibody detection region. **E.** The KO truncated *aqp3* was obtained and subcloned into the vector pcDNA4/TO/MyHis B (Invitrogen), then transfected into 293T cells using FuGENE (Roche) following manufacturer's instructions. After Zeocin selection, cells were processed for AQP3 immunofluorescence assay and showed cytoplasmic/membrane localization. These results explained the observed positive AQP3 staining in *Aqp3*<sup>-/-</sup> sperm. scale bar: 50 $\mu$ m. For each data presented, results were repeated in 2-3 independent mice.
