# Supplementary material
Source: PubMed Central journal article supplement (PMC3343308)
Supplement: cr2010169x2.pdf [file cr2010169x2.pdf]

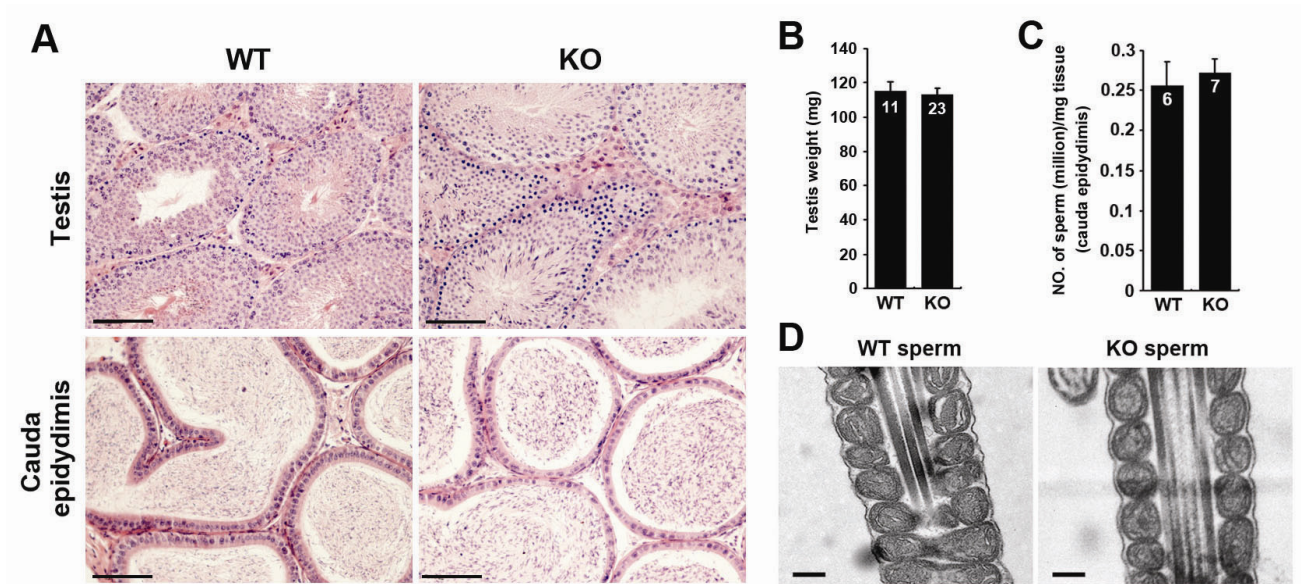

**Supplementary Figures S2** Morphological and histological examination of testis, epididymis and sperm count between wild-type and *Aqp3*<sup>-/-</sup> mice. **A.** Paraformaldehyde fixed, hematoxylin/eosin-stained sections of testis and epididymis. Scale represents 20  $\mu$ m. **B,C.** Testicular weight (**B**) (after 24 hours fixation in Paraformaldehyde) and sperm count (**C**) is comparable between wild-type and *Aqp3*<sup>-/-</sup> male ( $P > 0.05$ , Student's t test). Numbers within the bars indicate number of mice used for each assay. Error bars represent s.e.m. **D.** Ultrastructural analyses of wild-type and *Aqp3*<sup>-/-</sup> sperm reveals comparable internal tail structure. Scale bars represent 0.2  $\mu$ m.
