# Supplementary material
Source: PubMed Central journal article supplement (PMC3343308)
Supplement: cr2010169x3.pdf [file cr2010169x3.pdf]

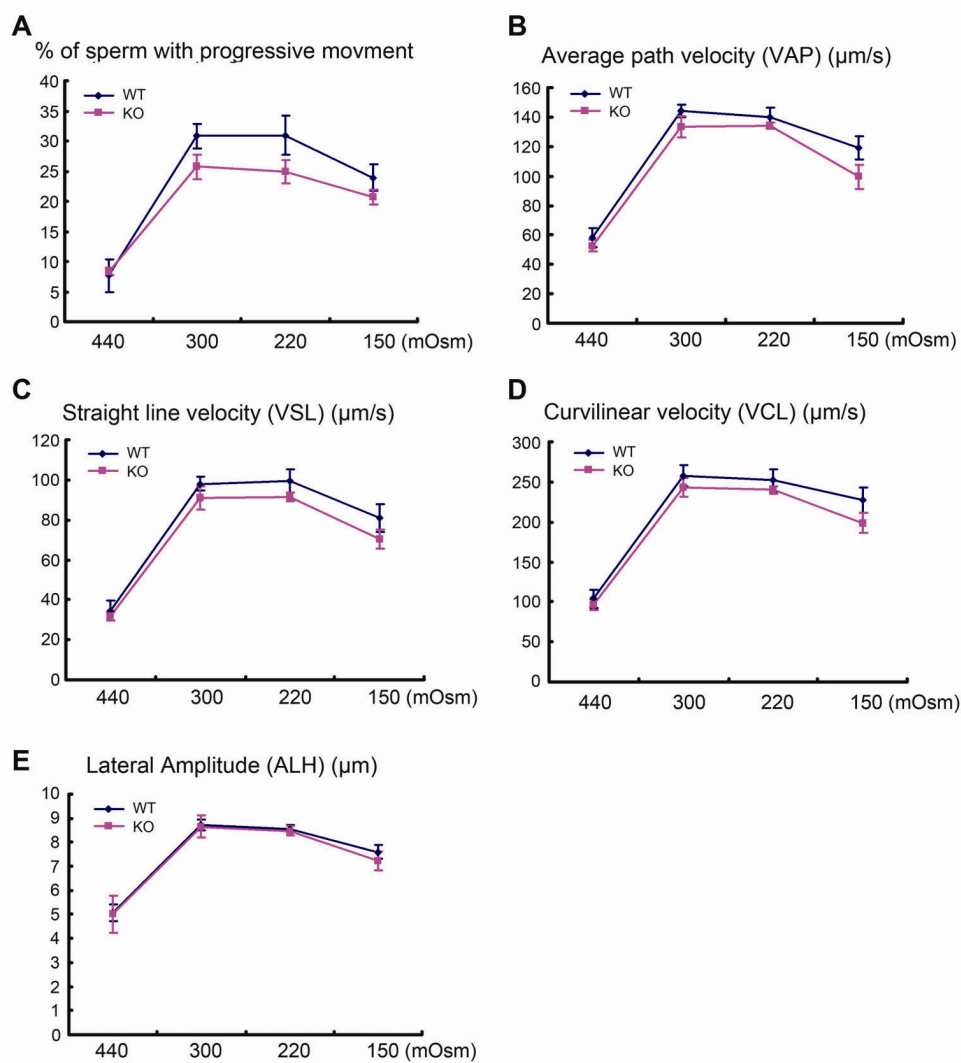

**Supplementary Figures S3** Physiological hypotonic stress stimulates sperm motility “start up” in both wild-type and *Aqp3*<sup>-/-</sup> sperm. Cauda epididymal sperm from both genotypes were directly released into NaCl solution with different osmolarity. The motion parameters were analyzed and recorded by a CASA analysis system. All data represented are obtained 10 min after releasing into solution. **A.** Percentage of sperm with progressive movement (VAP>50 $\mu\text{m/s}$ , STR (VSL/VAP)>80%). **B.** Average path velocity (VAP). **C.** Straight line velocity (VSL). **D.** Curvilinear velocity (VCL). **E.** Amplitude of lateral head displacement (ALH). For each presented motility parameter, there is a significant change between 440 and 300 mOsm ( $P < 0.00001$ ,  $t$ -test). No statistical significance was found between wild-type and *Aqp3*<sup>-/-</sup> group ( $P > 0.05$ ,  $t$ -test), although some parameters shows slightly decrease in *Aqp3*<sup>-/-</sup> group. 5-9 mice were used for each osmolarity. All error bars represent s.e.m.
