# Supplementary material
Source: PubMed Central journal article supplement (PMC3343308)
Supplement: cr2010169x4.pdf [file cr2010169x4.pdf]

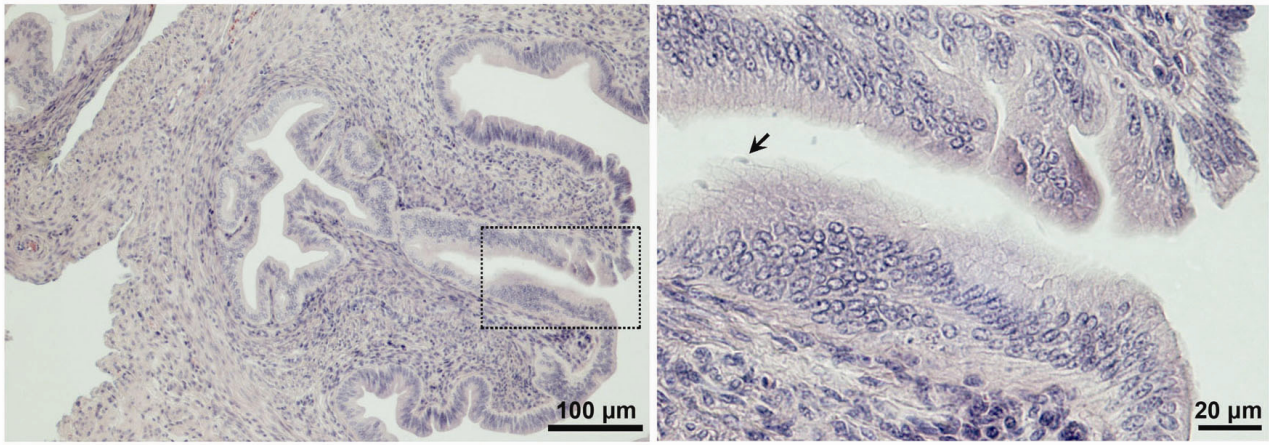

**Supplementary Figures S4** Tissue sections showing example of sperms transportation through uterine-oviduct junction (2 h after copulation). Sperms were indicated by arrows.
