# Supplementary material
Source: PubMed Central journal article supplement (PMC3343308)
Supplement: cr2010169x10.pdf [file cr2010169x10.pdf]

**Supplementary Table S1** Primers used for RT-PCR

| Transcript       | Forward primer(5'-3') | Reverse primer(5'-3')  |
|------------------|-----------------------|------------------------|
| AQP3             | GCCCATCTATGCACTGGCA   | CGAAAAGCTCATTGTTGGCAA  |
| AQP3 full length | AGCTACTTTGCACTCGTACG  | GATCTGCTCCTTGTGTTTCATG |
| AQP7             | TCGTGACTGGGATGCTGC    | ACGGGATGGGTTGATTGC     |
| AQP8             | CAGCCTTTGCCATCGTCCAGG | CCTAATGAGCAGTCCTACAAAG |
| AQP11            | GCCTTCGTCCTGGAGTTT    | TCCTTTCGTCGTAATGGTAC   |
| protamine1       | GCTCACAGGTTGGCTGGCTCG | TGGTGTATGAGCGGCGGCGA   |
| Protamine2       | GAGCGCGTAGAGGACTATGG  | CAGACATCGACATGGAATGG   |
| 18S              | AATCAGGGTTCGATTCCGGA  | CCAAGATCCAACACTACGAGCT |
